# Supplementary material for: Sequence and gene expression evolution of paralogous genes in willows
Source: PubMed Central journal article supplement (PMC4687058; doi:10.1038/srep18662), 2015-12-22
Supplement: srep18662-s1.pdf [file srep18662-s1.pdf]

## SUPPLEMENTARY INFORMATION FOR

### **Sequence and gene expression evolution of paralogous genes in willows**

Srilakshmy L. Harikrishnan<sup>1†</sup>, Pascal Pucholt<sup>1†</sup> & Sofia Berlin<sup>1\*</sup>

<sup>†</sup>These authors contributed equally to this work.

<sup>1</sup> Swedish University of Agricultural Sciences, Department of Plant Biology, Uppsala  
BioCenter, Linnean Centre for Plant Biology, P.O. Box 7080, SE-75007 Uppsala,  
Sweden.

Correspondence should be addressed to S.B. ([sofia.berlin@slu.se](mailto:sofia.berlin@slu.se))

## Supplementary Figure

**Figure S1.** Ka/Ks ratios of Salicoid duplicates classified based on level of differential expression.

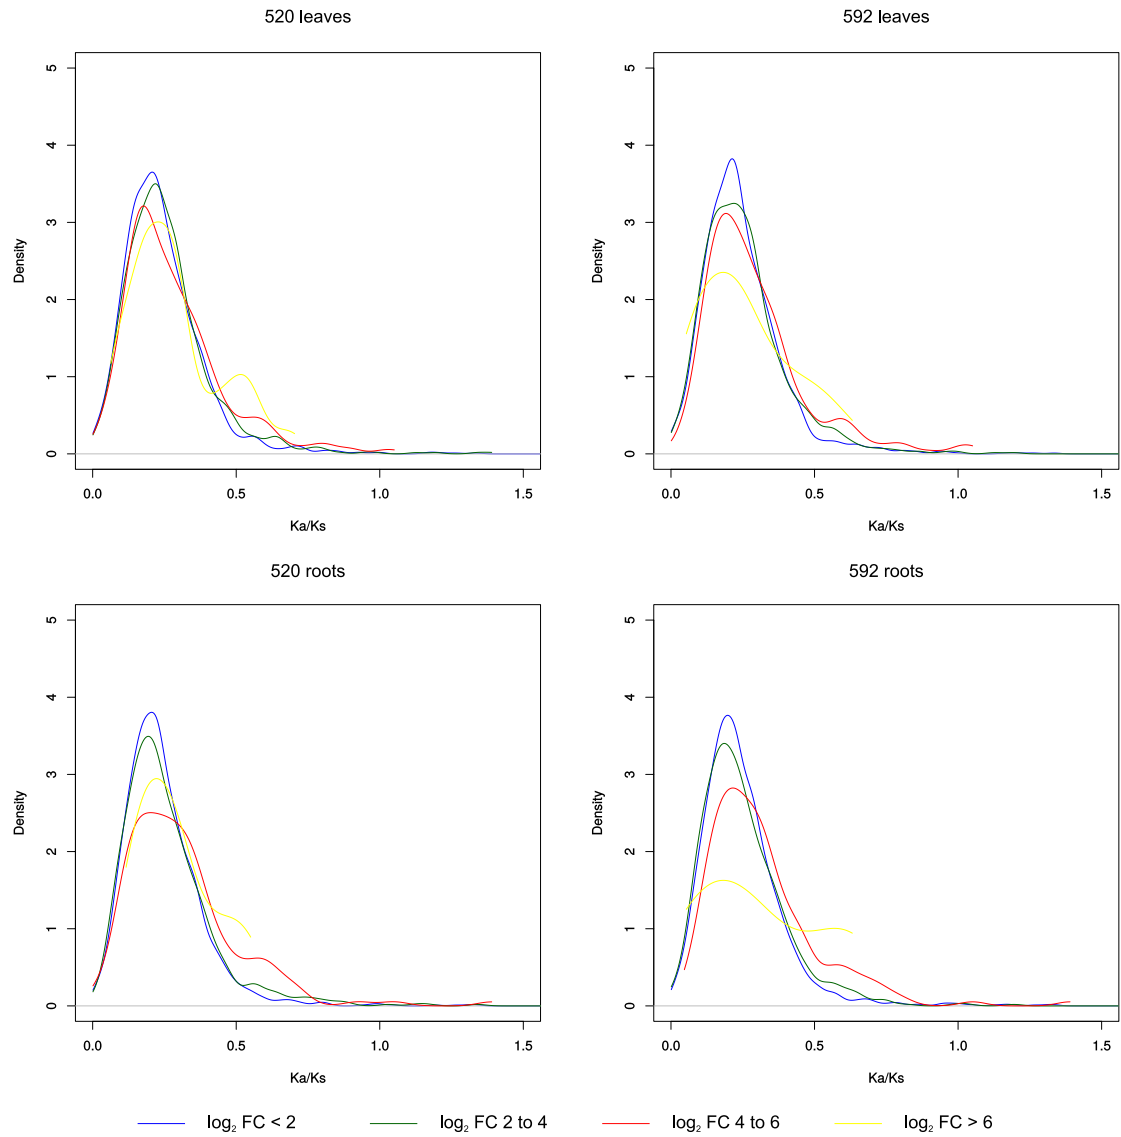

## **Supplementary Tables**

**Table S1.** All paralogs with Ka, Ks, Ka/Ks and 4DTV values.

(included in a separate excel file)

**Table S2.** Expression values of Salicoid duplicates for each sample separately.

(included in a separate excel file)

**Table S3.** Analysis of differential expression between Salicoid duplicates for each sample separately.

(included in a separate excel file)

**Table S4.** Annotation of contigs in the filtered assembly.

(included in a separate excel file)
